# Supplementary material for: Efficient Adsorption of Deoxynivalenol by Porous Carbon Prepared from Soybean Dreg
Source: Toxins (Basel). 2021 Jul 18;13(7):500. doi: 10.3390/toxins13070500 (PMC8310275; doi:10.3390/toxins13070500)
Supplement: Supplementary file 1 [file toxins-13-00500-s001.zip › toxins-1294719-supplementary.pdf]

# Supplementary Materials: Efficient Adsorption of Deoxynivalenol by Porous Carbon Prepared from Soybean Dreg

Zhiwei Ying, Di Zhao, He Li, Xinqi Liu and Jian Zhang

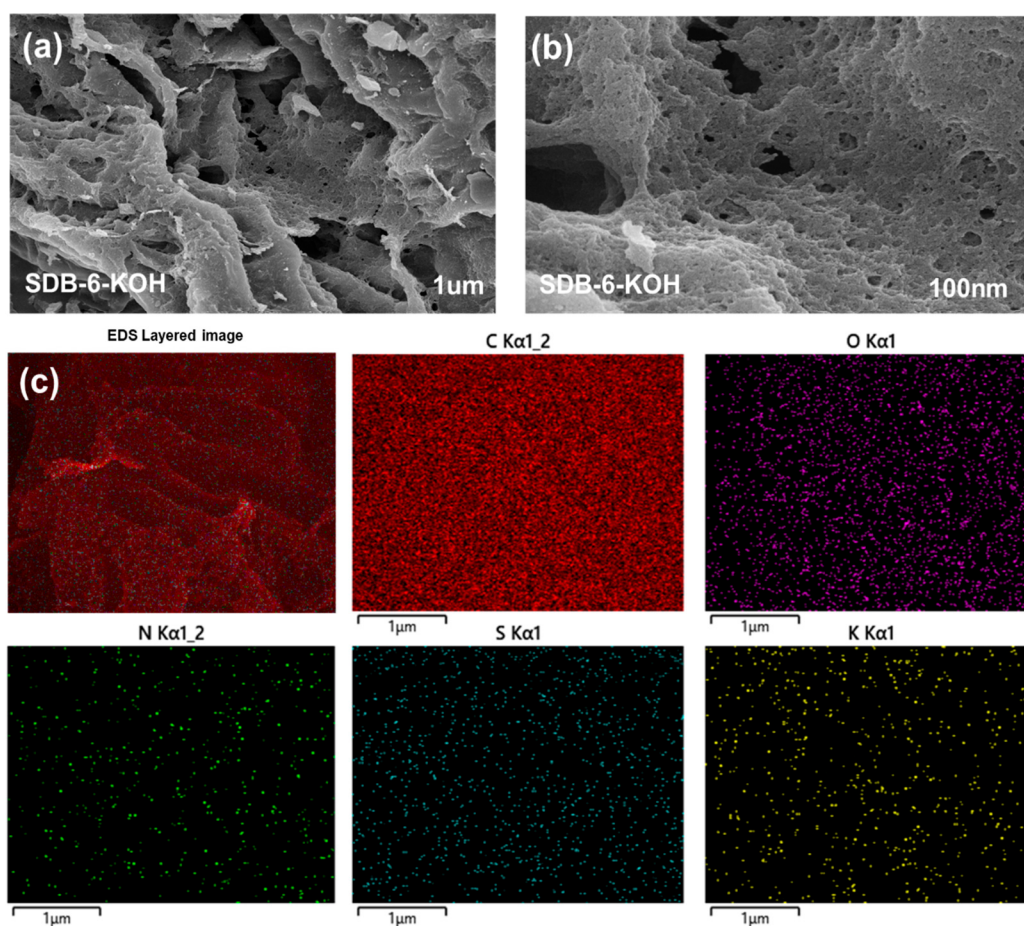

**Figure S1.** (a-b) SEM images and (c) elemental mappings of SDB-6-KOH.

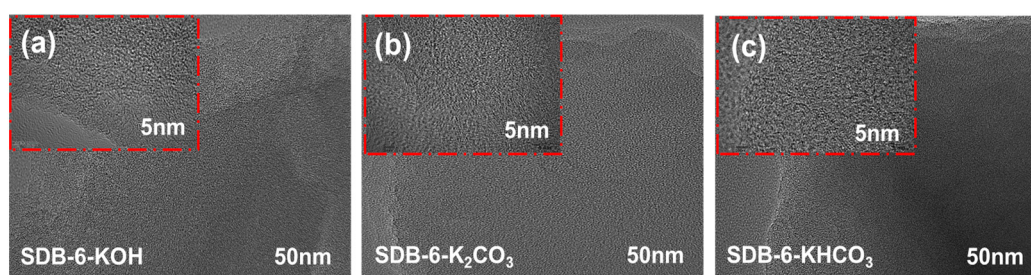

**Figure S2.** HRTEM images for (a) SDB-6-KOH, (b) SDB-6-K<sub>2</sub>CO<sub>3</sub>, (c) SDB-6-KHCO<sub>3</sub>.

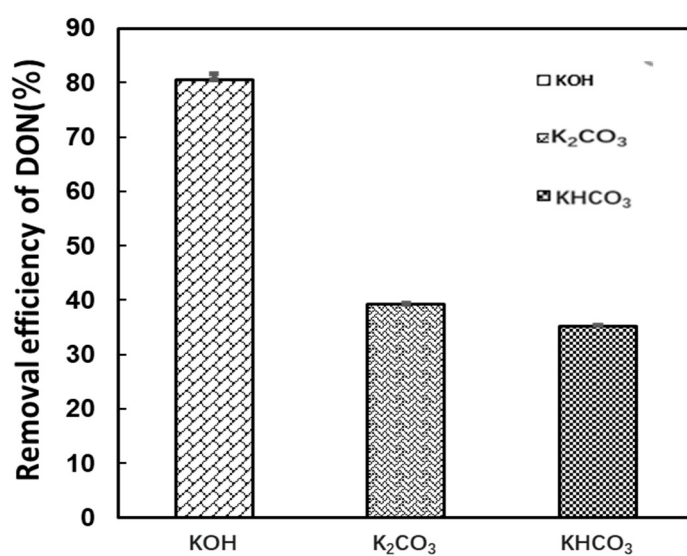

**Figure S3.** Influence of different adsorbent on DON removal efficiency. Conditions:  $T = 308\text{ K}$ ;  $C_0 = 60\text{ }\mu\text{g mL}^{-1}$ ,  $m = 1.0\text{ mg mL}^{-1}$ ,  $V = 5\text{ mL}$

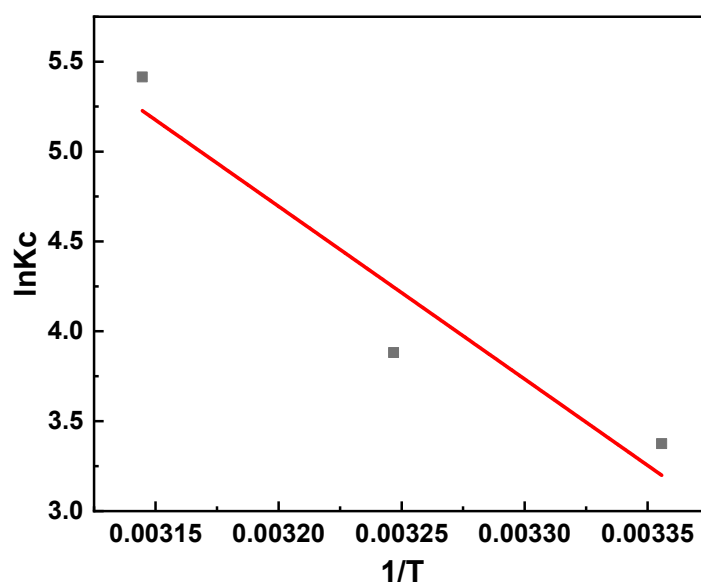

**Figure S4.** The plot of  $\ln K_c$  against  $1/T$  for the adsorption of DON onto SDB-6-KOH. Conditions:  $T = 298, 308, 318\text{ K}$ ;  $C_0 = 60\text{ }\mu\text{g mL}^{-1}$ .
